# Supplementary material for: Multi-step vs. single-step resistance evolution under different drugs, pharmacokinetics, and treatment regimens
Source: eLife. 2021 May 18;10:e64116. doi: 10.7554/eLife.64116 (PMC8184216; doi:10.7554/eLife.64116)
Supplement: Figure 1—source data 1. — Calculated mean and standard deviation for mutational benefits and costs taken from Spohn et al., 2019 or Melnyk et al., 2015 for individual antimicrobial classes are given. [file elife-64116-fig1-data1.xlsx]

## Sheet: Spohn et al. 2019 data
Figure 1B - source data from Spohn et al., 2019. Mean and standard deviation for mutational benefits and costs are given for different AMP or antibiotic classes; either for all classes used in the paper, or only for those antimicrobials where benefit and costs were measured.
	all classes			classes for which fitness was calculated as well
AMP class	MIC benefit mean	MIC benefit sd		AMP class	MIC benefit mean	MIC benefit sd	Fitness cost mean	Fitness cost sd
BAC5	4.8056	1.53288		BAC5	5.90397	1.58964	0.35501	0.24338
CAP18	313.198	1.48084		CAP18	383.176	1.56298	0.185505	0.0936759
CP1	1.23114	1.39769		HBD3	9	1	0.053018	0.098958
HBD3	8.431	1.21644		LL37	39.9262	2.06165	0.109933	0.145794
IND	2.0237	1.34933		PEX	8	2.68728	0.238783	0.184214
LL37	12.3777	5.47755		PR39	6.83746	3.21195	0.0569718	0.110332
PEX	3.03143	3.57483		PROA	11.9126	1.92018	0.447848	0.19774
PGLA	1.28209	1.51444		PXB	1774.32	1.64808	0.410545	0.201159
PLEU	2.79562	1.32281
PR39	3.92186	2.96225
PROA	4.24925	3.37182
PXB	645.602	3.9143
R8	1	1
TPII	1	1
TPII *	1	1
	all classes			classes for which fitness was calculated as well
antibiotic class	MIC benefit mean	MIC benefit sd		MIC benefit mean	MIC benefit sd	Fitness cost mean	Fitness cost sd
APC	59.7141	1.83476		84.4485	1.40838	0.628648	0.166861
CHL	19.2418	2.75448		40.8031	2.02961	0.576423	0.172111
CPR	656.22	3.9641		1657.92	3.35615	0.563183	0.198627
DOX	147.033	1.72765		147.033	1.68722	0.234654	0.0889732
ERY	44.2151	2.34533		84.9137	1.61731	0.68544	0.221879
FOX	17.3967	1.83838		30.2645	1.26457	0.274849	0.163332
KAN	158.637	1.76455		180.377	1.45236	0.813407	0.0740173
NAL	91	1		91	1	0.331987	0.126953
NIT	104.017	1.80516		147.171	1.41404	0.182354	0.238041
TET	22.3973	2.62296		47.5214	1.62972	0.399006	0.187182
TOB	101.228	1.98248		168.897	1.40838	0.813795	0.0711353
TRM	67.1201	4.52165		213.39	2.09588	0.0946334	0.128631

## Sheet: Melnyk et al. 2015 data
Figure 1B - source data from Melnyk et al., 2015. Mean and standard deviation for mutational benefits and costs are given for different antibiotic classes.
	MIC benefit mean	MIC benefit sd	Fitness cost mean	Fitness cost sd
amikacin	833.333	1	0.0391	0.0156271
ciprofloxacin	5.10096	2.76103	0.0563846	0.14103
clarithromycin	2133.33	1	0.033575	0.000601041
coumermycin	62.5	NA	0.04	NA
erythromycin	307.2	1.3634	0.173	0.0178885
fusidic acid	563	48.524	0.2448	0.238036
myxopyronin	56.3636	2.31753	0.157636	0.0641019
norfloxacin	5.83156	1.70208	0	0.0217008
novobiocin	62.5	1	0.045	0.00707107
rifampicin	16691.3	21.3902	0.14988	0.293857
streptomycin	250	1.93347	0.300293	0.268694
trimethoprim	8	1.94184	0	0.029033
