# Supplementary material for: Multi-step vs. single-step resistance evolution under different drugs, pharmacokinetics, and treatment regimens
Source: eLife. 2021 May 18;10:e64116. doi: 10.7554/eLife.64116 (PMC8184216; doi:10.7554/eLife.64116)
Supplement: Supplementary file 1. — Parameter values and units used in the pharmacodynamic model for either antibiotic or antimicrobial peptide simulations are shown. [file elife-64116-supp1.docx]

| **Parameters** | **Value** | **Unit** | **Description** |
| --- | --- | --- | --- |
| *r* | 1 | h-1 | Replication rate |
| *b* | 2-100 | xMIC | Benefit per mutation |
| *c* | 0.008-0.2 | - | Cost per mutation |
| *u* | 3*10-6, 1*10-6 | Probability per cell division | Mutation rate (AB, AMP) |
| *K* | 109 | CFU | Carrying capacity |
|  | 0.01 | h-1 | Death rate |
|  | -5, -50 | h-1 | Min. growth rate (AB, AMP) |
| *a* | 0.1-100 | xMIC | Drug concentration |
| *ka* | 0.5 | h-1 | Drug absorption rate |
| *k* | 0.1 | h-1 | Drug decay rate |
| *κ* | 1.5, 5 | - | Steepness of the PD curve (AB, AMP) |
| *τ* | 1/24 | h-1 | Dose frequency |
| *k2cmax* | 12-96 | h | Time till max. dose |
| *Mi* | 0-109 | CFU | Population with i mutations |
| *Mpi* | 0-109 | CFU | Population with a plasmid and i mutations |
| *bp* | 0.6-24 | xMIC | Benefit of the plasmid |
| *cp* | 0.03-0.1 | - | Cost of the plasmid |
| *α* | 3*10-10 | h-1 | Plasmid acquisition rate from the environment |
| *β* | 3*10-8 | h-1 | Plasmid acquisition rate from *Mpi* carriers |
|  | 105 | CFU | Max. acceptable pathogen burden |
